# Supplementary material for: Novel Amides Derivative with Antimicrobial Activity of Piper betle var. nigra Leaves from Indonesia
Source: PubMed Central journal article supplement (PMC7826617; doi:10.3390/molecules26020335), 2021-01-11
Supplement: molecules-26-00335-s001.pdf [file molecules-26-00335-s001.pdf]

Article

# Novel Amides Derivative with Antimicrobial Activity of *Piper Betle* var. *nigra* Leaves from Indonesia

Fajar Prasetya <sup>1</sup>, Supriatno Salam <sup>2</sup>, Agung Rahmadani <sup>1,2,3</sup>, Kansy Haikal <sup>2</sup>, Lizma Febrina <sup>1</sup>, Hady Anshory <sup>4</sup>, Muhammad Arifuddin <sup>1</sup>, Vita Olivia Siregar <sup>1</sup>, Angga Cipta Narsa <sup>1</sup>, Herman Herman <sup>1</sup>, Islamudin Ahmad <sup>1</sup>, Niken Indriyanti <sup>1</sup>, Arsyik Ibrahim <sup>1</sup>, Rolan Rusli <sup>1</sup>, Laode Rijai <sup>1</sup> and Hadi Kuncoro <sup>1,\*</sup>

- <sup>1</sup> Faculty of Pharmacy, Universitas Mulawarman, Samarinda, Kalimantan Timur 75123, Indonesia; fajarprasetya@farmasi.unmul.ac.id (F.P.); agungchempharm8794@gmail.com (A.R.); lizmafebrina@farmasi.unmul.ac.id (L.F.); marifuddin@farmasi.unmul.ac.id (M.A.); vitaoliviasiregar@farmasi.unmul.ac.id (V.O.S.); angga@farmasi.unmul.ac.id (A.C.N.); herman@farmasi.unmul.ac.id (H.H.); islamudinahmad@farmasi.unmul.ac.id (I.A.); nikenindriyanti@farmasi.unmul.ac.id (N.I.); arsyik@farmasi.unmul.ac.id (A.I.); rolan@farmasi.unmul.ac.id (R.R.); laoderijai@farmasi.unmul.ac.id (L.R.).
- <sup>2</sup> Department of Chemistry, Faculty of Mathematics and Natural Sciences, Universitas Padjadjaran, Jatinangor 45363, Indonesia; supriatno.salam@gmail.com (S.S.); kansyhaikal@unpad.ac.id (K.H.)
- <sup>3</sup> Departement of Chemistry Education, Faculty of Teaching and Education, Mulawarman University, Samarinda 75123, Kalimantan Timur, Indonesia
- <sup>4</sup> Departement of Pharmacy, Faculty of Mathematics and Natural Sciences, Islamic University of Indonesia, Jogjakarta 55584, Indonesia; hadyanshory@uii.ac.id
- \* Correspondence: hadikuncoro@farmasi.unmul.ac.id; Tel.: +62-541-739-491; Cell Phone: +62-82-158-220-088

---

| <b>Table of Contents</b>                                                              | <b>Page</b> |
|---------------------------------------------------------------------------------------|-------------|
| <b>Figure S1.</b> <sup>1</sup> H-NMR Spectra of (1) (500 MHz in CD <sub>3</sub> OD)   | 3           |
| <b>Figure S2.</b> <sup>13</sup> C-NMR Spectrum of (1) (125 MHz in CD <sub>3</sub> OD) | 4           |
| <b>Figure S3.</b> DEPT-135° Spectrum of (1) (135 MHz in CD <sub>3</sub> OD).          | 5           |
| <b>Figure S4.</b> HMQC Spectrum of (1).                                               | 6           |
| <b>Figure S5.</b> HMBC Spectrum of (1).                                               | 7           |
| <b>Figure S6.</b> <sup>1</sup> H- <sup>1</sup> H-COSY Spectra of (1).                 | 8           |
| <b>Figure S7.</b> TOF MS Spectra of (1)                                               | 9           |
| <b>Figure S8.</b> <sup>1</sup> H-NMR Spectra of (2) (500 MHz in CD <sub>3</sub> OD)   | 10          |
| <b>Figure S9.</b> <sup>13</sup> C-NMR Spectrum of (2) (125 MHz in CD <sub>3</sub> OD) | 11          |
| <b>Figure S10.</b> DEPT-135° Spectrum of (2) (135 MHz in CD <sub>3</sub> OD).         | 12          |
| <b>Figure S11.</b> HMQC Spectrum of (2).                                              | 13          |
| <b>Figure S12.</b> HMBC Spectrum of (2).                                              | 14          |
| <b>Figure S13.</b> <sup>1</sup> H- <sup>1</sup> H-COSY Spectra of (2).                | 15          |
| <b>Figure S14.</b> TOF MS Spectra of (2)                                              | 16          |

---

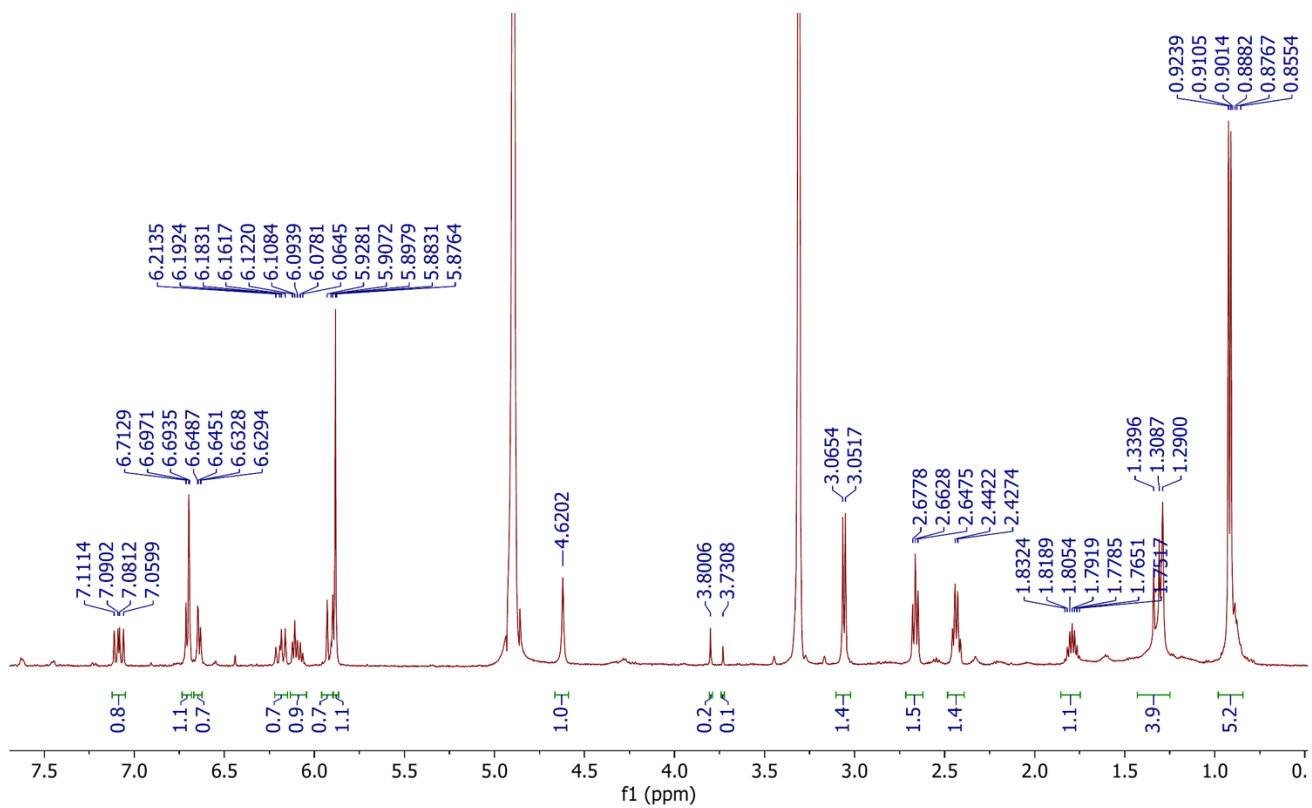

Figure S1. <sup>1</sup>H-NMR Spectra of (1) (500 MHz in CD<sub>3</sub>OD).

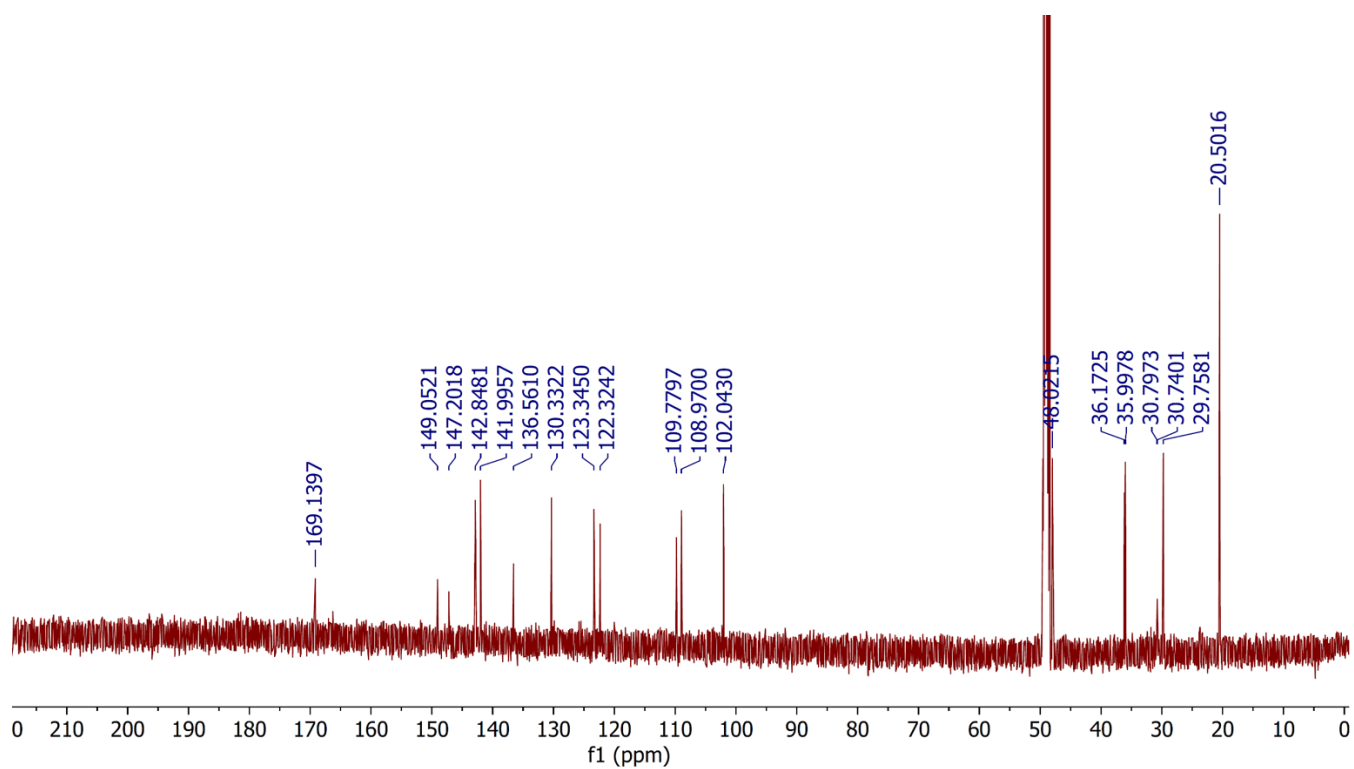

Figure S2.  $^{13}\text{C}$ -NMR Spectrum of (1) (125 MHz in  $\text{CD}_3\text{OD}$ ).

Fajar-ds1\_DEPT

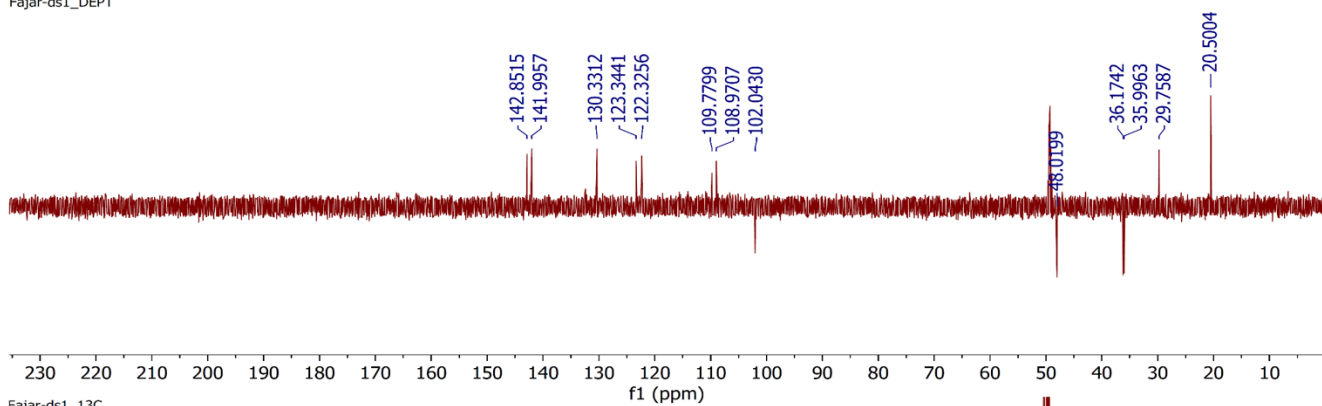

Fajar-ds1\_13C

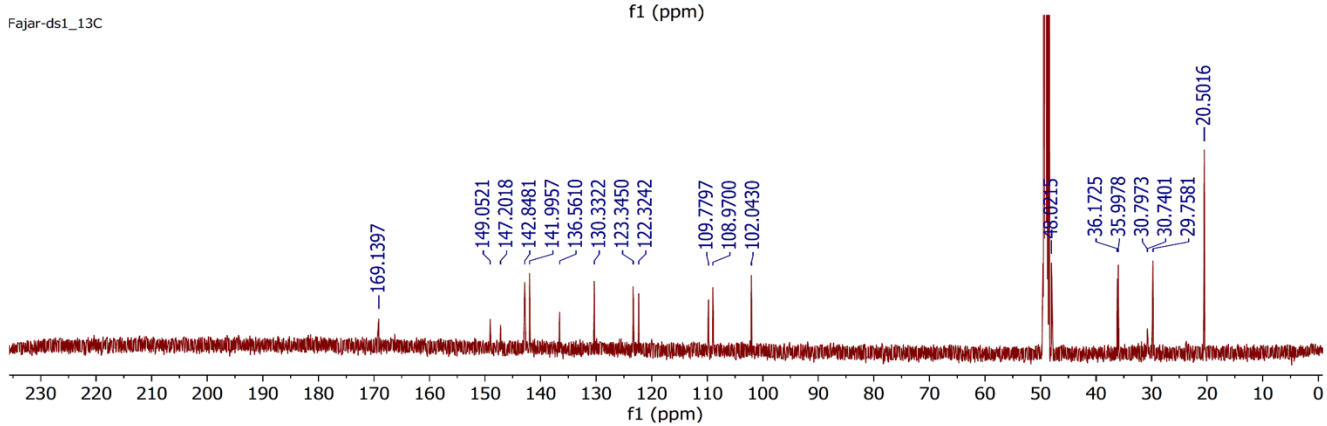

Figure S3. DEPT-135° Spectrum of (1) (135 MHz in CD<sub>3</sub>OD).

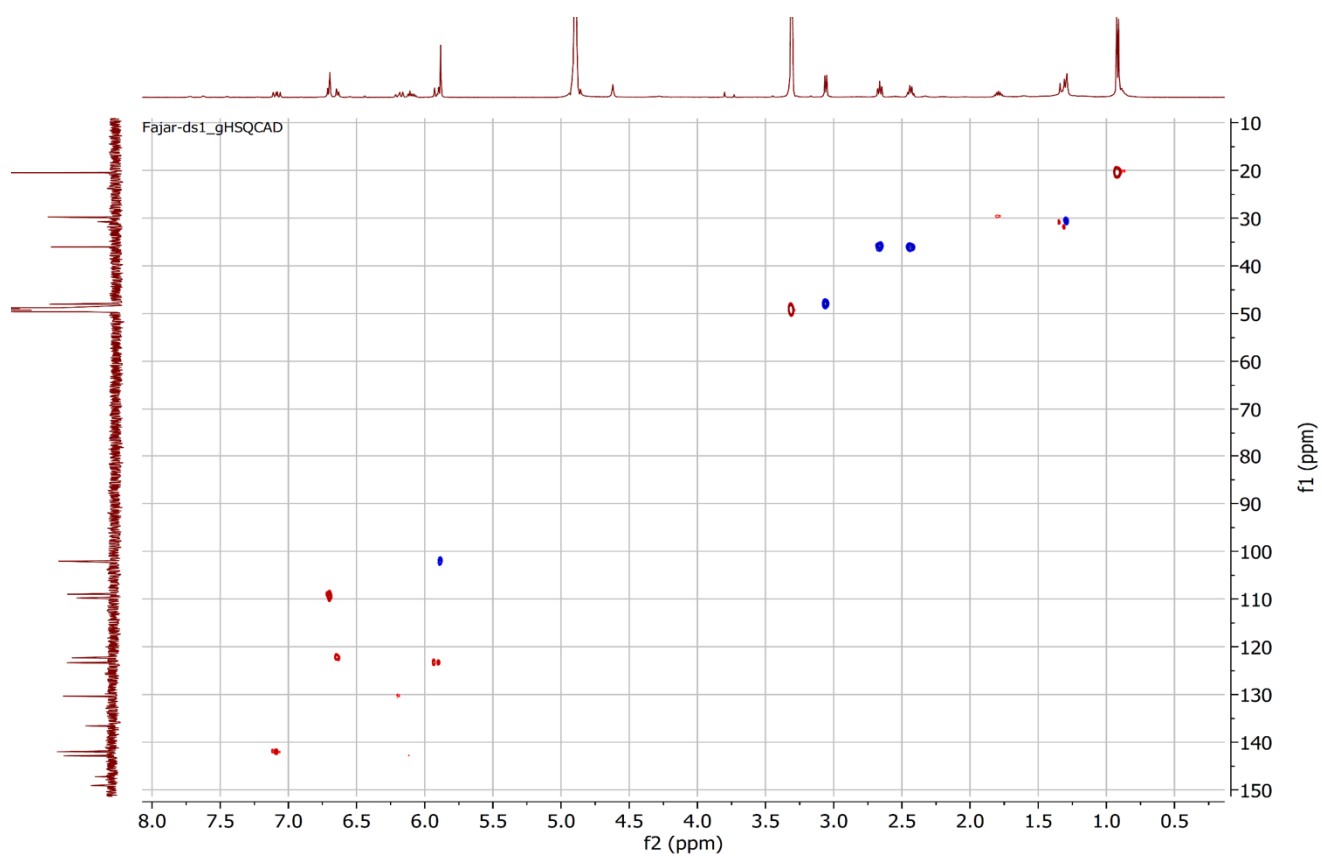

Figure S4. HMQC Spectrum of (1).

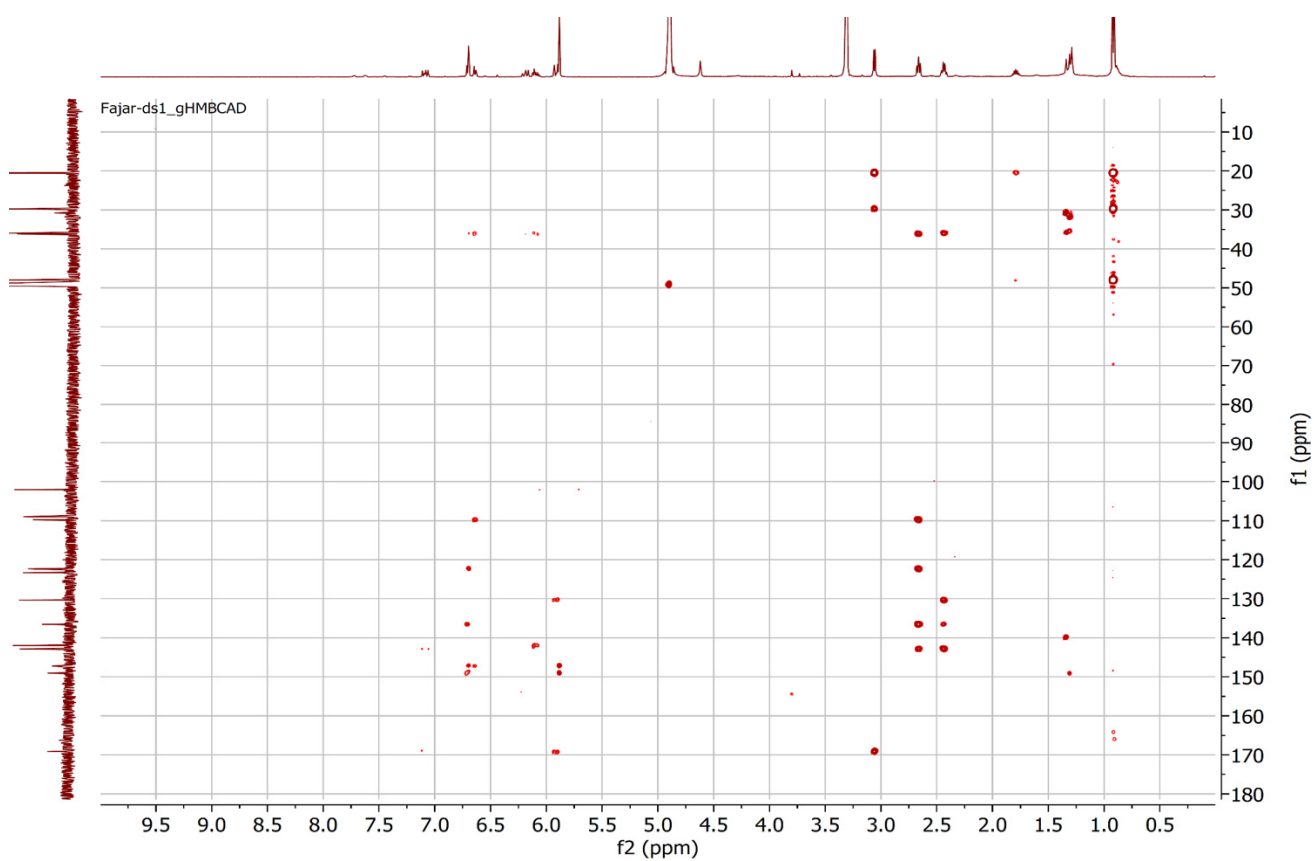

Figure S5. HMBC Spectrum of (1).

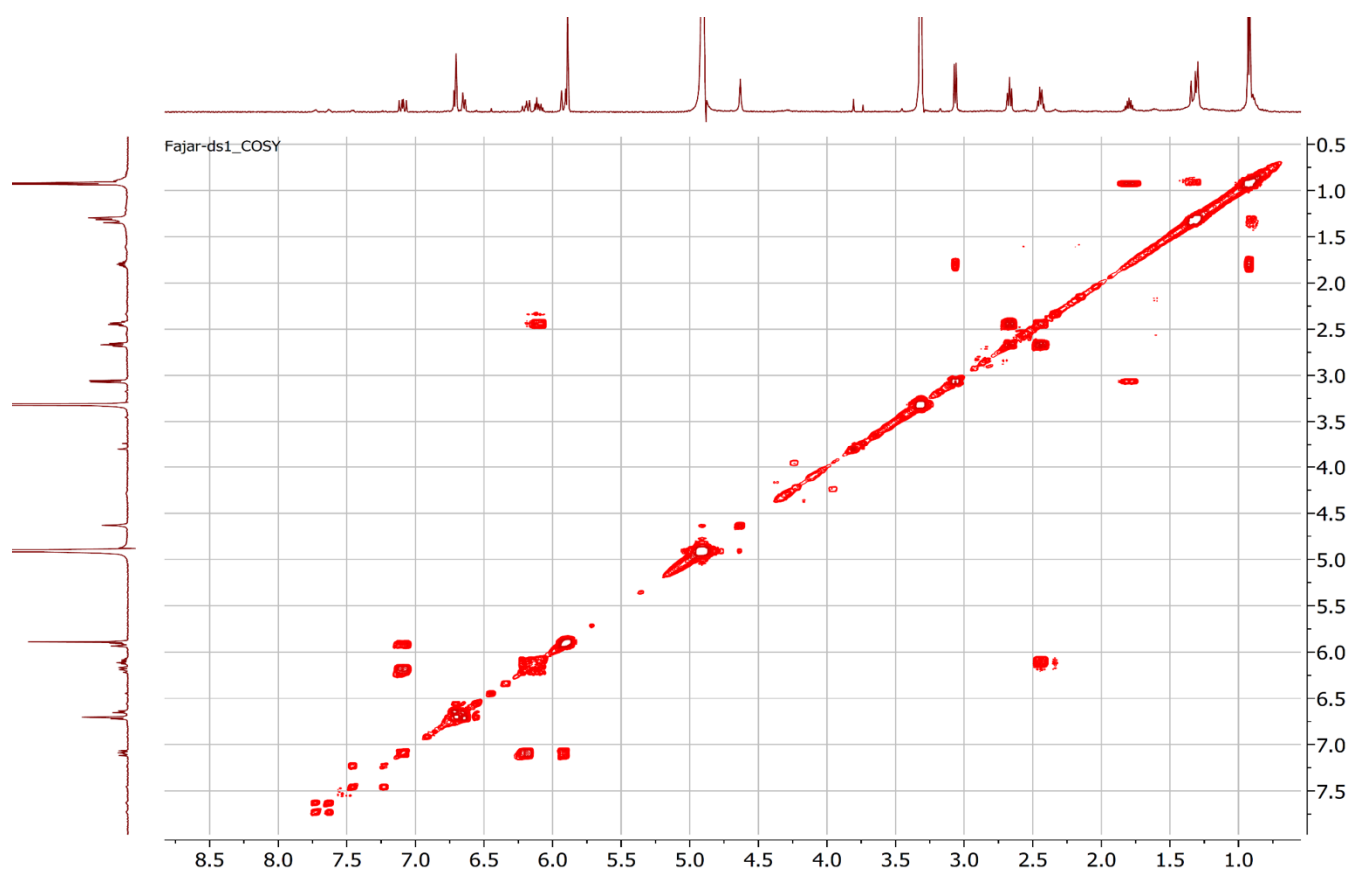

Figure S6.  $^1\text{H}$ - $^1\text{H}$ -COSY Spectra of (1).



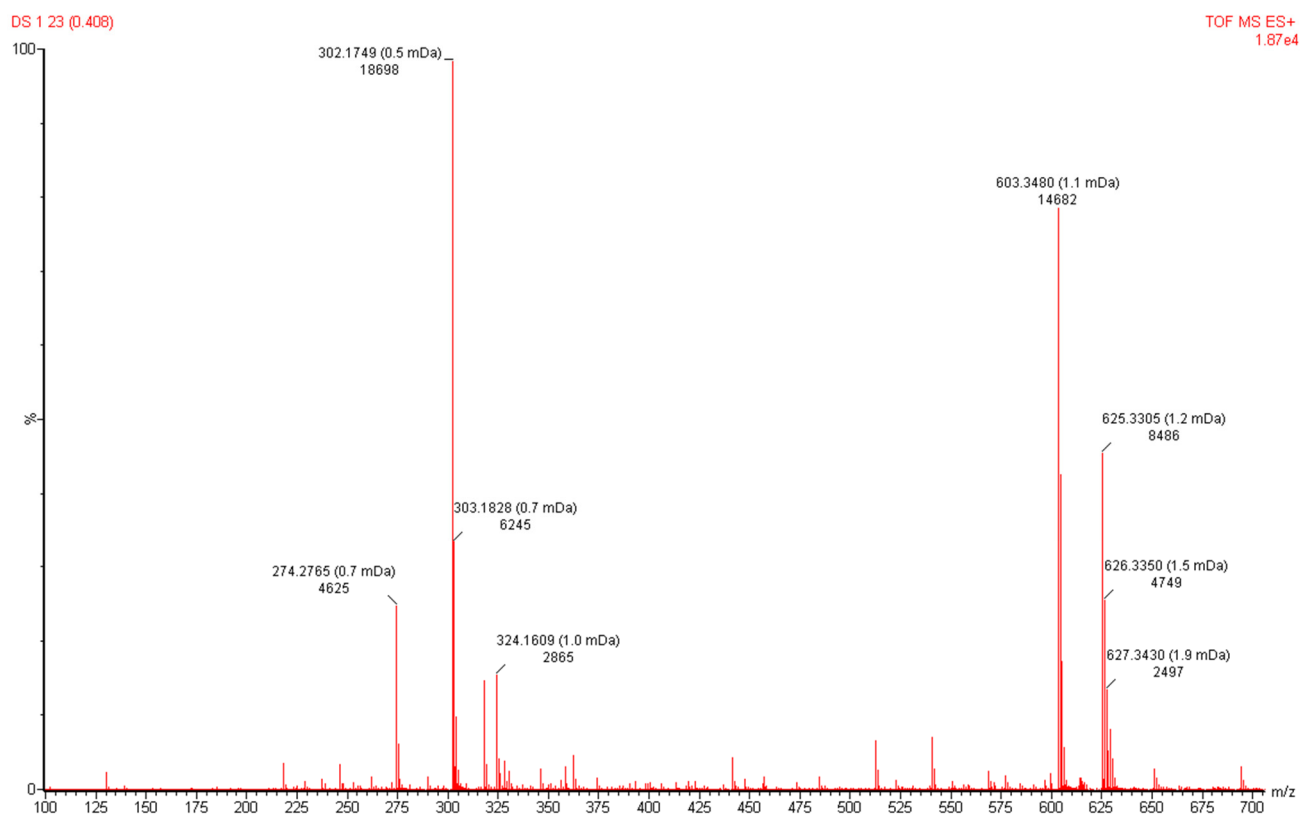

Figure 7. TOF MS Spectra of (1).

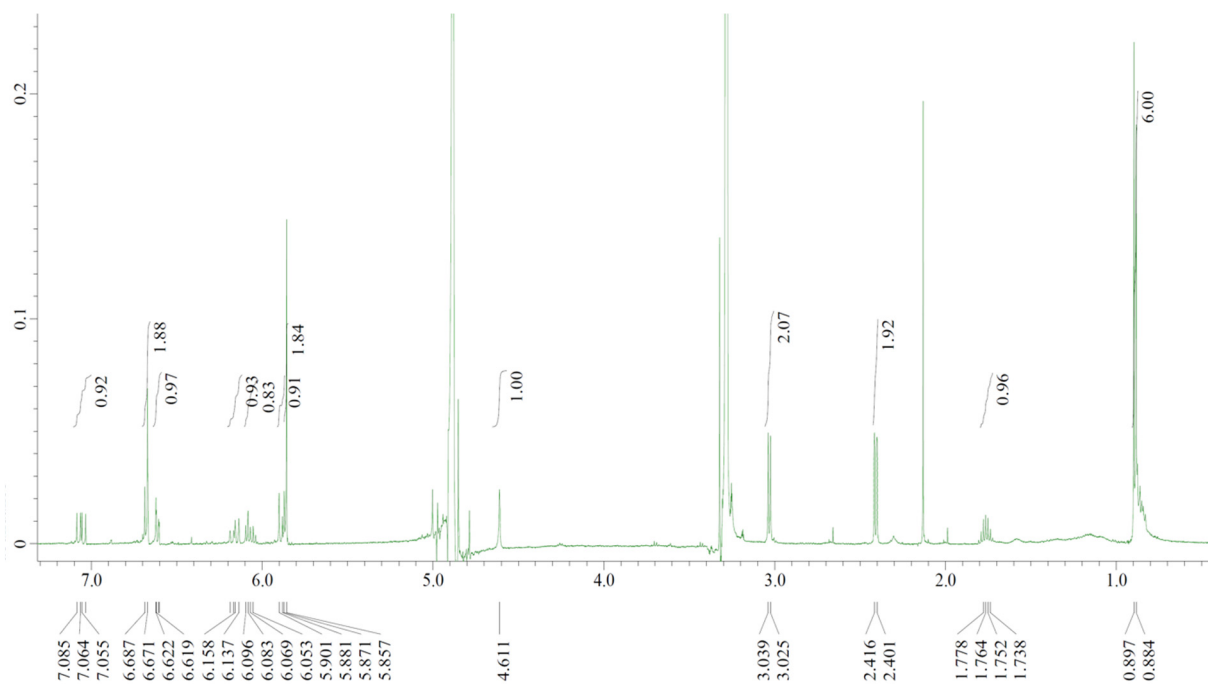

**Figure S8.** <sup>1</sup>H-NMR Spectra of (2) (500 MHz in CD<sub>3</sub>OD).

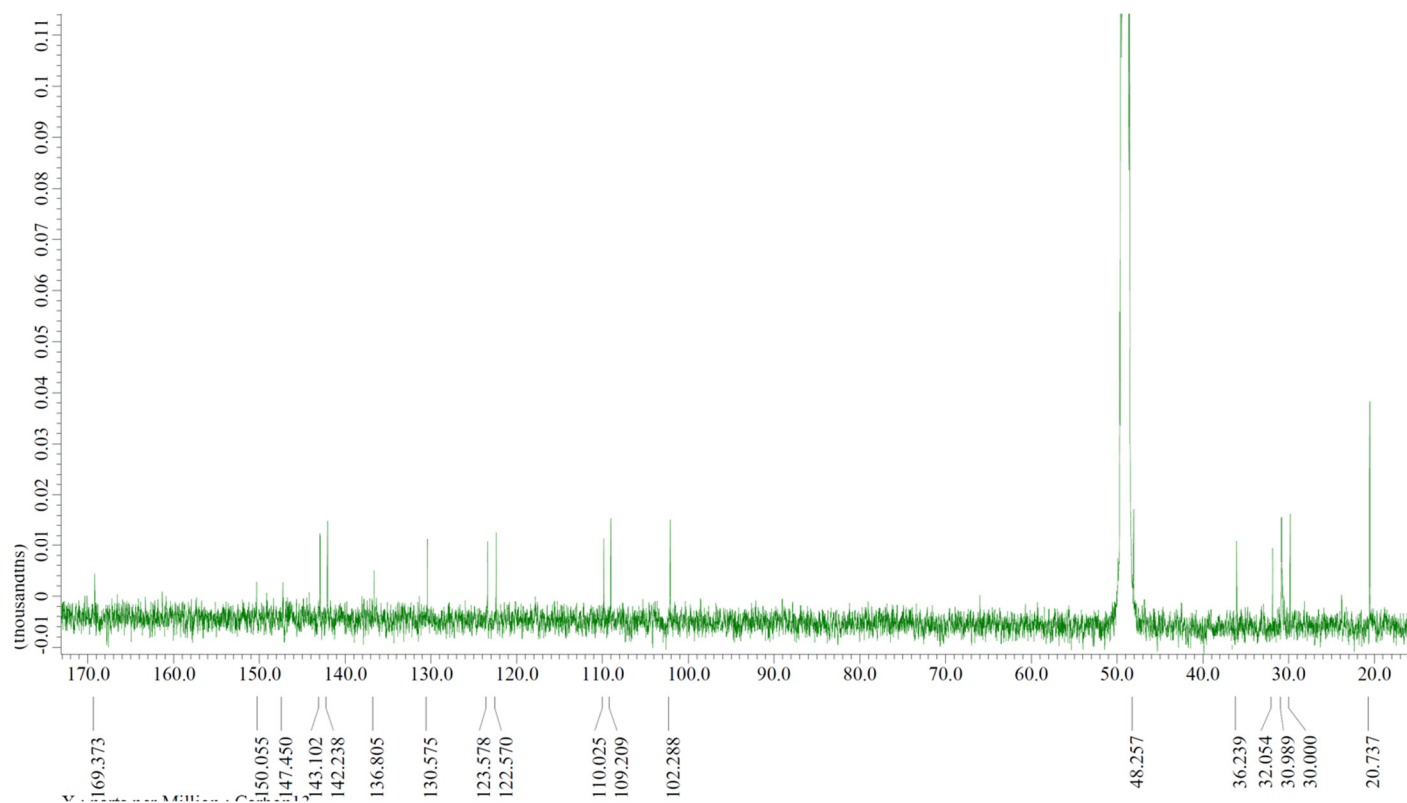

**Figure S9.**  $^{13}\text{C}$ -NMR Spectrum of (2) (125 MHz in  $\text{CD}_3\text{OD}$ ).

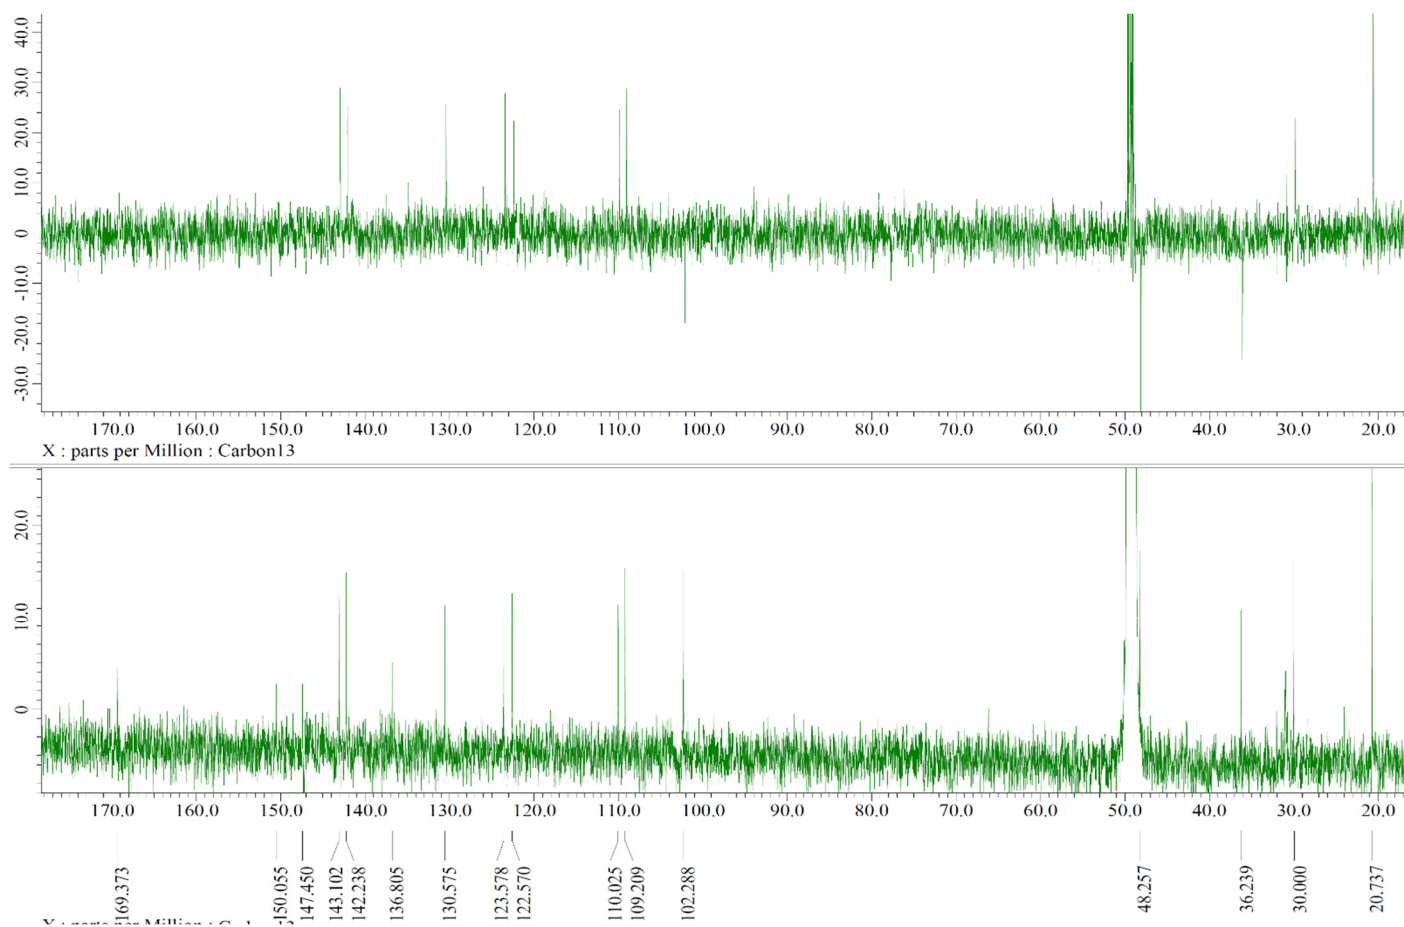

**Figure S10.** DEPT-135° Spectrum of (2) (135 MHz in CD<sub>3</sub>OD).

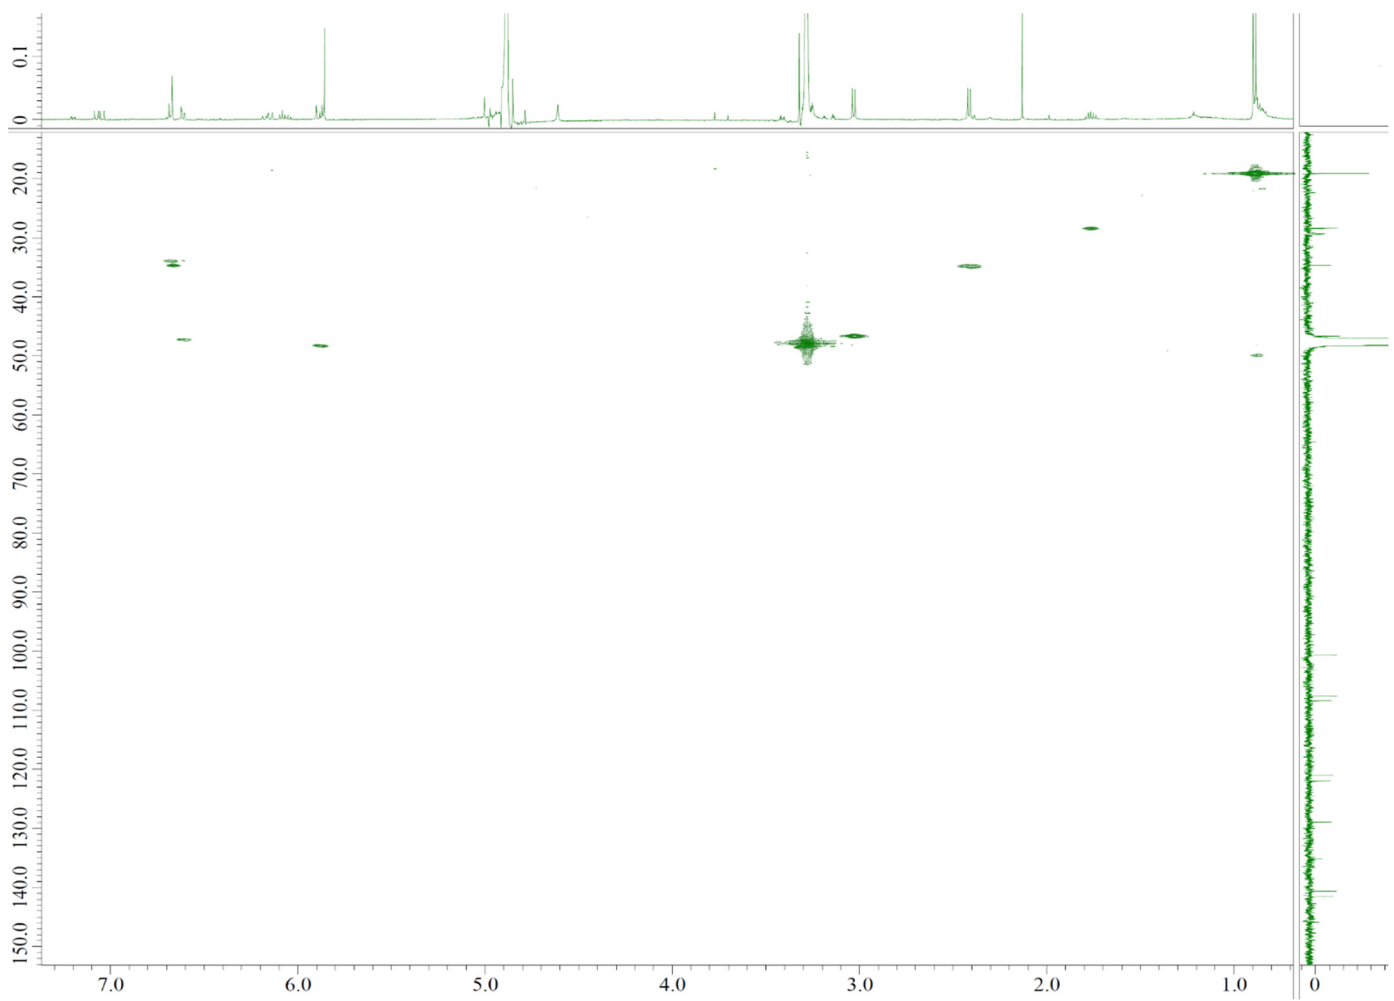

Figure S11. HMQC Spectrum of (2).

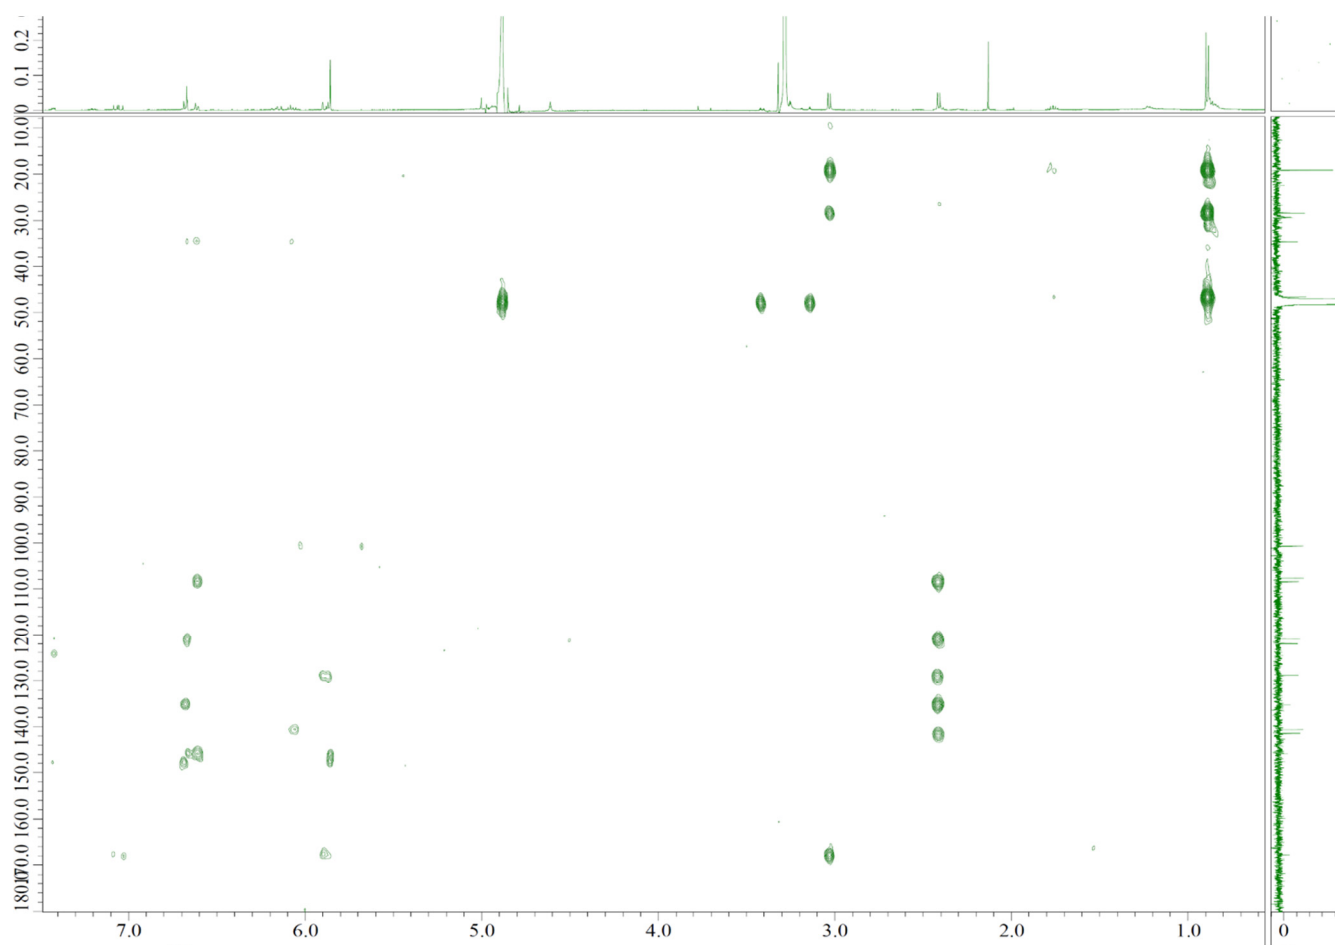

Figure S12. HMBC Spectrum of (2).

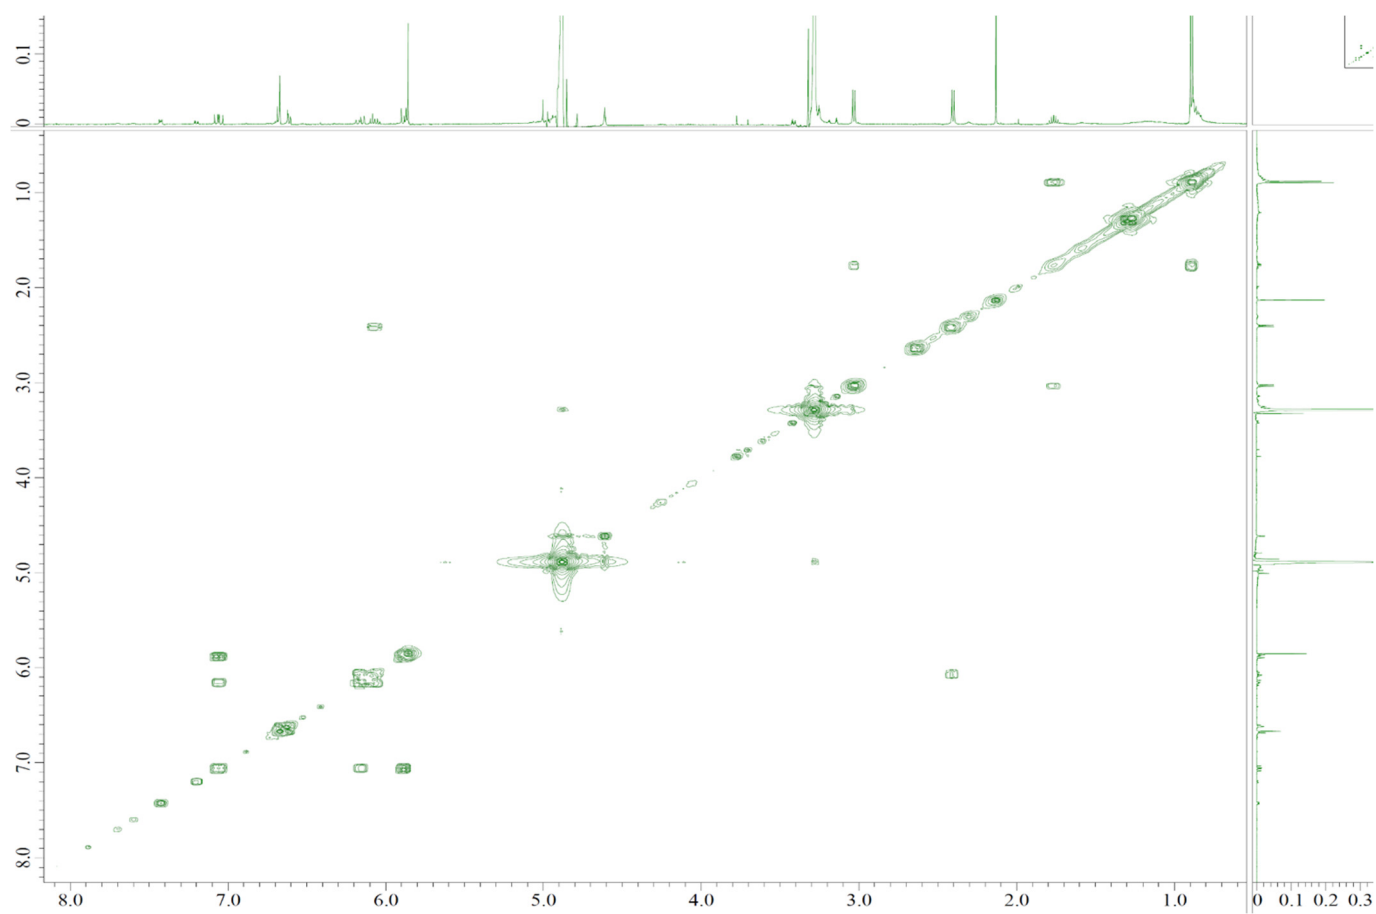

Figure S13.  $^1\text{H}$ - $^1\text{H}$ -COSY Spectra of (2).

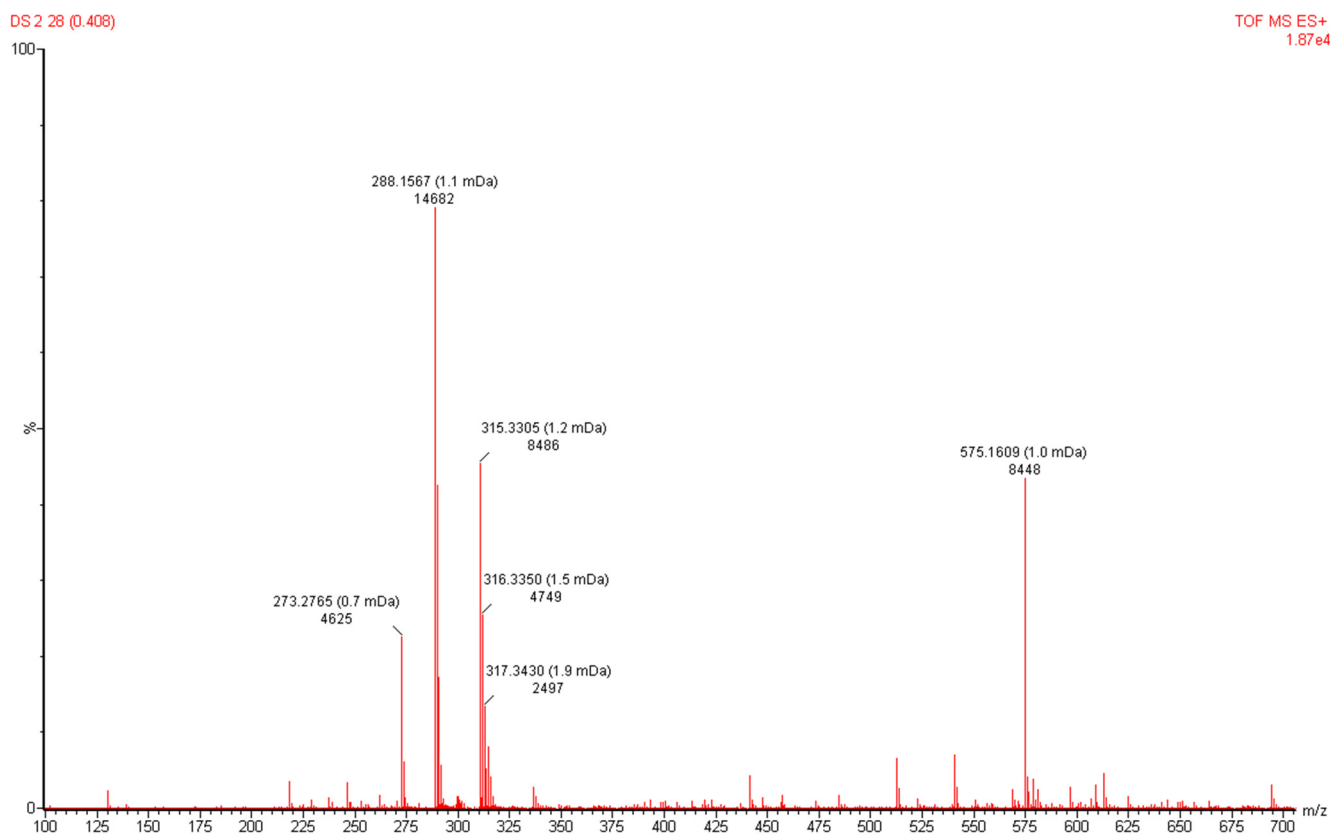

Figure S14. TOF MS Spectra of (2).
